# Supplementary material for: Elucidation of oxyanion coordination geometries at solid surfaces of varied electric field strengths
Source: Royal Society of Chemistry journal article supplement (doi:10.1039/b909925e), 2009-01-01
Supplement: b909925e.pdf [file b909925e.pdf]

# Elucidation of oxyanion coordination geometries at solid surfaces of varied electric field strengths

Jean-François Boily\*<sup>a</sup>

## 5 SUPPLEMENTARY INFORMATION

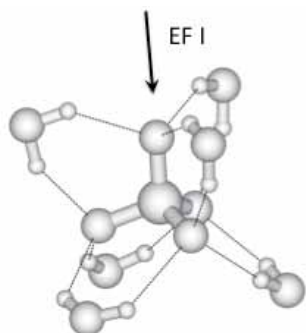

Fig S1. Optimised geometry of  $[\text{SO}_4(\text{H}_2\text{O})_6]^{2-}$  under EF I (0.26 V/Å) (B3LYP/6-311+G(3df,pd)).

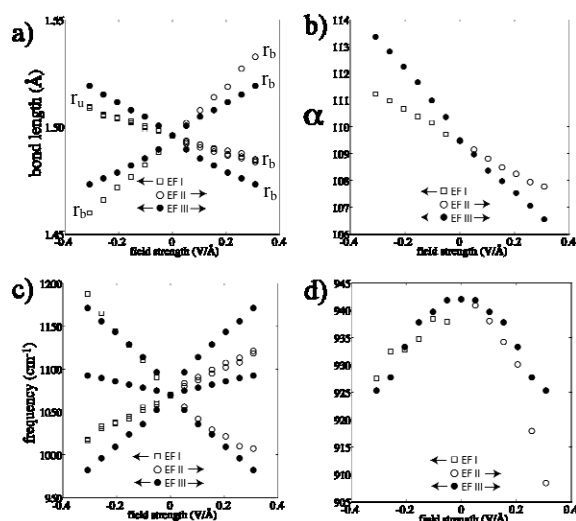

15 Fig. S2. Field strength effects on (a) bond lengths, (b) angle, (c)  $\nu_3$  S-O and (d)  $\nu_1$  S-O (raw B3LYP/6-311+G(3df,pd) frequencies) of  $[\text{SO}_4(\text{H}_2\text{O})_6]^{2-}$ .

Table S1. Field strength-dependence ( $\delta$ ) of geometry and stretching frequencies

|                                                   | $\text{SO}_4^{2-}$ | $[\text{SO}_4(\text{H}_2\text{O})_6]^{2-}$ |
|---------------------------------------------------|--------------------|--------------------------------------------|
| <b>EF I &amp; EF II</b>                           |                    |                                            |
| $\delta(r_{\text{O}}, \delta(r_{\text{b}})^{[a]}$ | 0.0193, 0.0578     | 0.0356, 0.120                              |
| $\delta(\alpha)^{[b]}$                            | 2.73               | 5.70                                       |
| $\delta(\nu_1), \delta(\nu_3)^{[b]}$              | 80, 154            | 160, 207                                   |
| <b>EF III</b>                                     |                    |                                            |
| $\delta(r_{\text{S-O}})^{[a]}$                    | 0.0326             | 0.0782                                     |
| $\delta(\alpha)^{[b]}$                            | 4.64               | 11.36                                      |
| $\delta(\nu_1), \delta(\nu_3)^{[b]}$              | 15, 133            | 73, 319                                    |

[a] Å per V/Å. [b]  $\text{cm}^{-1}$  per V/Å

### Methods

20 Geometries and frequencies were calculated with the program Gaussian03<sup>1</sup> at an integration grid of 99 radial shells and 590 angular points per shell. Vibrational frequencies were determined analytically from the Hessian matrix on the fully-optimized structure at the same level of theory. All molecular geometries presented in this study correspond to 25 potential energy surface minima, as confirmed by the lack of negative frequencies. No frequency shift factors<sup>2</sup> were however applied to these theoretical frequencies given the focus of this paper on spectral shifts, rather than absolute values. Electron Localization Function calculations were carried out with the program TopMod<sup>3</sup> using Gaussia03-formatted 30 wave function files generated from single point calculations of fully-optimized geometries.

The synthetic spectra of Fig. 3 were generated from the theoretical frequencies by applying a Lorentzian function with a half maximum band width of 30  $\text{cm}^{-1}$ . This band width was chosen as an 35 approximate value for the triply degenerate  $\nu_3$  band of sulfate in aqueous solution at room temperature.

### References

- 1 K.N. Kudin, J.C. Burant, J.M. Millam, S.S. Iyengar, J. Tomasi, V. Barone, B. Mennucci, M. Cossi, G. Scalmani, N. Rega, G.A. Petersson, H. Nakatsuji, M. Hada, M. Ehara, K. Toyota, R. Fukuda, J. Hasegawa, M. Ishida, T. Nakajima, Y. Honda, O. Kitao, H. Nakai, M. Klene, X Li, J.E. Knox, H.P. Hratchian, J.B. Cross, C. Adamo, J. Jaramillo, R. Gomperts, R.E. Stratmann, O. Yazyev, A.J. Austin, R. Cammi, C. Pomelli, J.W. Ochterski, P.Y. Ayala, K. Morokuma, G.A. Voth, P. Salvador, J.J. Dannenberg, V.G. Zakrzewski, S. Dapprich, A.D. Daniels, M.C. Strain, O. Farkas, D.K. Malick, A.D. Rabuck, K. Raghavachari, J.B. Foresman, J.V. Ortiz, Q. Cui, A.G. Baboul, S. Clifford, J. Cioslowski, B.B. Stefanov, G. Liu, A. Liashenko, P. Piskorz, I. Komaromi, R.L. Martin, D.J. Fox, T. Keith, M.A. Al-Laham, C.Y. Peng, A. Nanayakkara, M. Challacombe, P.M.W. Gill, B. Johnson, W. Chen, M.W. Wong, C. Gonzalez and J.A. Pople, *Gaussian 03*, revision B.04, Gaussian, Inc.: Pittsburgh, PA, **2003**.
- 2 A.P. Scott and L. Radom. *J. Phys. Chem.* 1996, 100,16502-16513.
- 3 S. Noury, X. Krokidis, F. Fuster, B. Silvi, *Comput. Chem.* 1999,23, 597-604.
